# Supplementary material for: Facile formation of Pt and PtPd nanoparticles on reactive carbon–TiO2 nanosheet substrates
Source: Royal Society of Chemistry journal article supplement (doi:10.1039/c1cc15426e), 2011-01-01
Supplement: c1cc15426e.pdf [file c1cc15426e.pdf]

## Supporting information for “Facile formation of Pt and PtPd nanoparticles on reactive carbon-TiO<sub>2</sub> nanosheet substrates.”

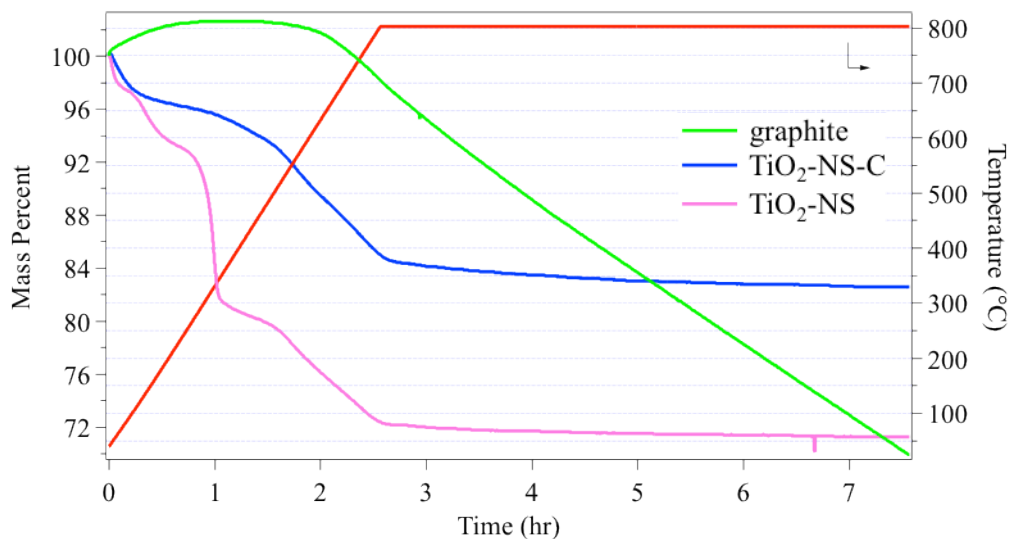

**S.I. 1.** TG Analysis (TGA) of TiO<sub>2</sub>-NS and TiO<sub>2</sub>-NS-C performed in air atmosphere at a ramp rate of 5 °C/min. The TGA profile of pure graphite is included as reference. TiO<sub>2</sub>-NS shows considerable mass loss between 200 and 350 °C likely due to decomposition of surface ethylene glycol adsorbates followed by further mass loss starting at 525 °C that is due to oxidation of graphite-like surface carbon species. In the case of TiO<sub>2</sub>-NS-C, minimal mass loss is observed up to 400 °C due to ethylene glycol already being decomposed as surface graphite species from the reforming gas treatment at 300 °C. The remaining mass loss observed for TiO<sub>2</sub>-NS-C at temperatures above 500 °C track well with the graphite reference. These results suggest that ethylene glycol first catalytically decomposes on the TiO<sub>2</sub>-NS surface to form TiO<sub>2</sub>-NS-C followed by further oxidation of surface graphite-like species at temperatures above 400 °C.

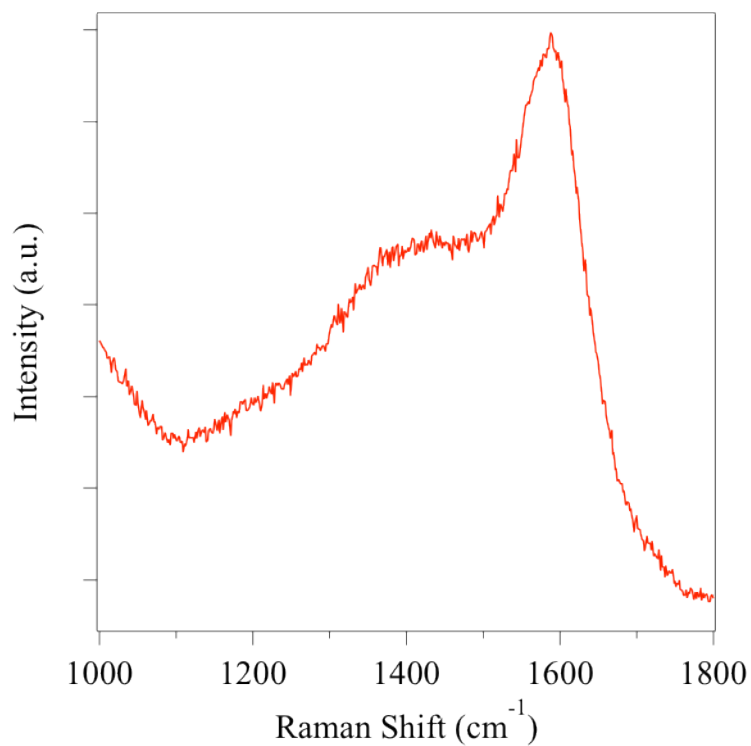

**S.I. 2.** Raman spectra of TiO<sub>2</sub>-NS-C. The bands centered at 1380 and 1580 cm<sup>-1</sup> are assigned to the D and G bands commonly observed for graphite. The spectrum was collected using a Renishaw InVia Raman microscope equipped with a 3 mW 514 Ar<sup>+</sup> laser focused to a 1 μm spot size.

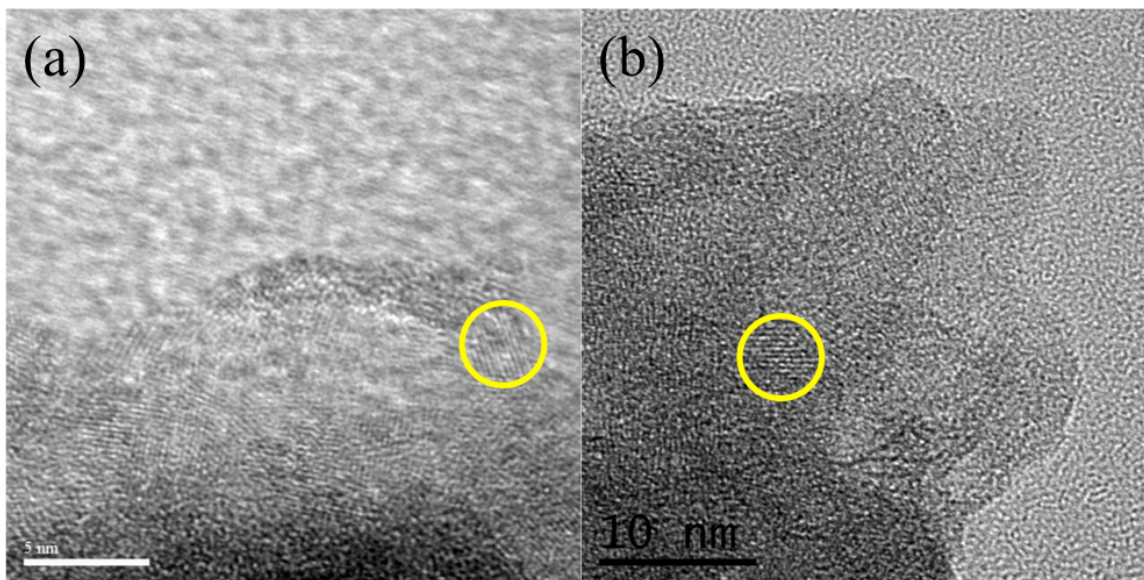

**S.I. 3.** TEM of TiO<sub>2</sub>-NS (a) and TiO<sub>2</sub>-NS-C (b). Both systems show the ultra thin sheet morphology as well as domains of crystallinity circled in yellow.

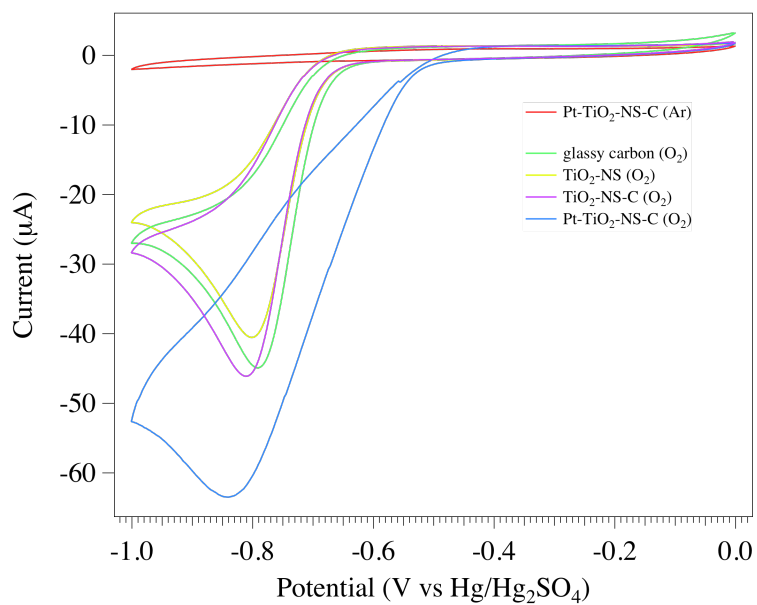

**S.I. 4.** Cyclic voltammetry of Pt-TiO<sub>2</sub>-NS-C on glassy carbon in Ar and O<sub>2</sub> saturated 0.1 M KOH solutions. See characterization section for further details.

**Characterization:** Dilute solutions of the materials were drop cast onto carbon coated Cu transmission electron microscopy (TEM) grids and allowed to dry at room temperature. Scanning electrochemical microscopy (SEM) was performed on a Hitachi S-5500 operated at 30kV and high resolution TEM (HR-TEM) was performed on a Jeol 2010F operated at 200 kV. X-ray diffraction (XRD) data were collected in transmission mode on a Rigaku R-Axis Spider diffractometer with an image plate detector using a graphite monochromator with Cu K $\alpha$  radiation ( $\lambda = 1.5418\text{\AA}$ ). The powder sample was mounted on a Hampton Research CryoLoop. Thermogravimetric analysis was collected on a Mettler-Toledo TGA/DSC-1 under air atmosphere. Raman spectra were acquired using a Renishaw InVia microscope equipped with a 514 nm Ar<sup>+</sup> laser operating at 3 mW.

Cyclic voltammetry (CV) measurements were performed using a CHI 400D potentiostat operated between 0 and -1.0 V at a scan rate of 10 mV/s with 0.1 M KOH serving as the electrolyte. Ar or O<sub>2</sub> was bubbled through the electrolyte for 20 minutes prior to CV and only the 5<sup>th</sup> cycle is shown. 5  $\mu\text{L}$  of an ink containing Pt-TiO<sub>2</sub>-NS-C, water and Nafion was deposited on a polished glassy carbon (GC) electrode to serve as the working electrode. Au wire and Hg/Hg<sub>2</sub>SO<sub>4</sub> served as the counter and reference electrodes, respectively.

**Synthesis of TiO<sub>2</sub>-NS:** See reference from main text.

**Synthesis of TiO<sub>2</sub>-NS-C:** Approximately 100 mg of TiO<sub>2</sub>-NS was loaded into a ceramic boat that was loaded into a quartz tube inside of a furnace. Reforming gas (5% H<sub>2</sub> / 95% Ar) was set to flow at 1000 sccm and the temperature was ramped to 300 °C at a rate of 10 °C/min and held at 300 °C for 2 hours.

**Synthesis of M-TiO<sub>2</sub>-NS-C:** 2 mL of absolute ethanol is added to 15 mg of TiO<sub>2</sub>-NS-C in a 25 mL round bottom flask and sonicated for 10 minutes at room temperature to create a well mixed suspension. Appropriate amounts of K<sub>2</sub>PtCl<sub>4</sub> and/or K<sub>2</sub>PdCl<sub>4</sub> are dissolved into a minimum of water such that 5% (wt%) metal loading is achieved for the product M-TiO<sub>2</sub>-NS-C (where M = Pt, Pd or PtPd). The product was washed several times in water or ethanol followed by centrifugation and overnight drying in a 60 °C oven.
